# Supplementary material for: Elucidation of complexation multi-equilibrium with MgII and a multisite ligand. A combined electronic spectroscopies and DFT investigation
Source: Royal Society of Chemistry journal article supplement (doi:10.1039/c4ra05048g), 2014-01-01
Supplement: c4ra05048g1.pdf [file c4ra05048g1.pdf]

**Elucidation of complexation multi-equilibrium with Mg<sup>II</sup> and a  
multisite ligand. A combined electronic spectroscopies and DFT  
investigation.**

Aurélien Moncomble,\* Jean-Paul Cornard

*LASIR – CNRS UMR8516, Université Lille 1 Sciences et Technologies, Bât C5 – 59 655 Villeneuve  
d'Ascq Cedex – France*

|                                               |    |
|-----------------------------------------------|----|
| Table S1                                      | S2 |
| Table S2                                      | S3 |
| Figures S1 and S2                             | S4 |
| Cartesian coordinates for evidenced molecules | S5 |

**Table S1:** Centres, widths, scale coefficient and linear combination coefficients obtained for each Gaussian function from the analysis of the spectra obtained by variation of temperature (centres given in nm and eV, widths in  $\text{cm}^{-1}$  and eV,  $x_5$  and  $\eta_i$  without unit).

|          | $\mu_3$       | $\sigma_3$     | $\mu_{5,1}$   | $\sigma_{5,1}$ | $\mu_{5,2}$   | $\sigma_{5,2}$ | $x_5$ |      |      |
|----------|---------------|----------------|---------------|----------------|---------------|----------------|-------|------|------|
|          | 429<br>(2.89) | 1104<br>(0.14) | 399<br>(3.11) | 1357<br>(0.17) | 331<br>(3.75) | 1920<br>(0.24) | 2.52* |      |      |
|          |               |                |               |                |               |                |       |      |      |
| T        | 10°C          | 15°C           | 20°C          | 25°C           | 30°C          | 35°C           | 40°C  | 45°C | 50°C |
| $\eta_3$ | 1157          | 1224           | 1289          | 1333           | 1371          | 1402           | 1429  | 1456 | 1474 |
| $\eta_5$ | 1858          | 1805           | 1751          | 1708           | 1668          | 1623           | 1594  | 1554 | 1520 |

\* This scale coefficient cannot be directly compared with the experimental data due to the presence of the normalisation coefficient of the Gaussian functions that includes their widths.

**Table S2:** Main geometrical parameters in the fundamental state for Q, C3 and C5 and in the first excited state for C3 and C5 (angle in ° and bond lengths in Å).

|                | Q     | S <sub>0</sub> C3 | S <sub>1</sub> C3 | S <sub>0</sub> C5 | S <sub>1</sub> C5 |
|----------------|-------|-------------------|-------------------|-------------------|-------------------|
| C2-C1'         | 1.458 | 1.455             | 1.417             | 1.458             | 1.426             |
| Dihedral angle | 4.4   | 0.8               | 0.3               | 0.3               | 0.1               |
| C9-O1          | 1.349 | 1.340             | 1.360             | 1.352             | 1.345             |
| O1-C2          | 1.360 | 1.365             | 1.378             | 1.354             | 1.381             |
| C2-C3          | 1.367 | 1.387             | 1.426             | 1.365             | 1.404             |
| C3-C4          | 1.441 | 1.446             | 1.445             | 1.442             | 1.401             |
| C4-C10         | 1.427 | 1.418             | 1.411             | 1.418             | 1.449             |
| C10-C9         | 1.401 | 1.404             | 1.407             | 1.413             | 1.381             |
| C9-C8          | 1.385 | 1.388             | 1.376             | 1.380             | 1.405             |
| C8-C7          | 1.392 | 1.389             | 1.408             | 1.395             | 1.404             |
| C7-C6          | 1.401 | 1.404             | 1.390             | 1.390             | 1.376             |
| C6-C5          | 1.382 | 1.380             | 1.391             | 1.405             | 1.433             |
| C5-C10         | 1.417 | 1.422             | 1.422             | 1.449             | 1.446             |
| C3-O3          | 1.349 | 1.305             | 1.285             | 1.349             | 1.347             |
| C4-O4          | 1.256 | 1.279             | 1.310             | 1.272             | 1.306             |
| C5-O5          | 1.337 | 1.338             | 1.338             | 1.285             | 1.269             |
| O3-Mg          | –     | 2.010             | 2.062             | –                 | –                 |
| O4-Mg          | –     | 2.082             | 2.038             | 2.030             | 1.989             |
| O5-Mg          | –     | –                 | –                 | 1.985             | 2.041             |

The variations are illustrated on Figures S1 and S2.

**Figure S1:** Main bond variations occurring upon the complexation of Q with Mg<sup>II</sup>. Only variations above 1 pm are reported, green is for lengthening whereas red is for shortening. (a) Formation of C3; (b) formation of C5.

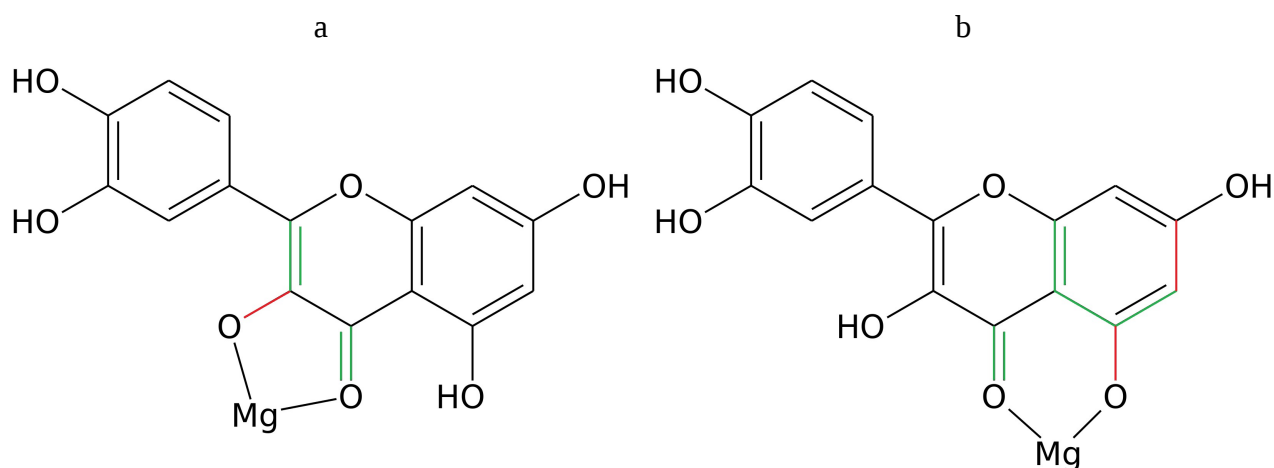

**Figure S2:** Main bond variations occurring upon the S1 ← S0 transition for C3 (a) and C5 (b) complexes. Only variations above 2.5 pm are reported, green is for lengthening whereas red is for shortening.

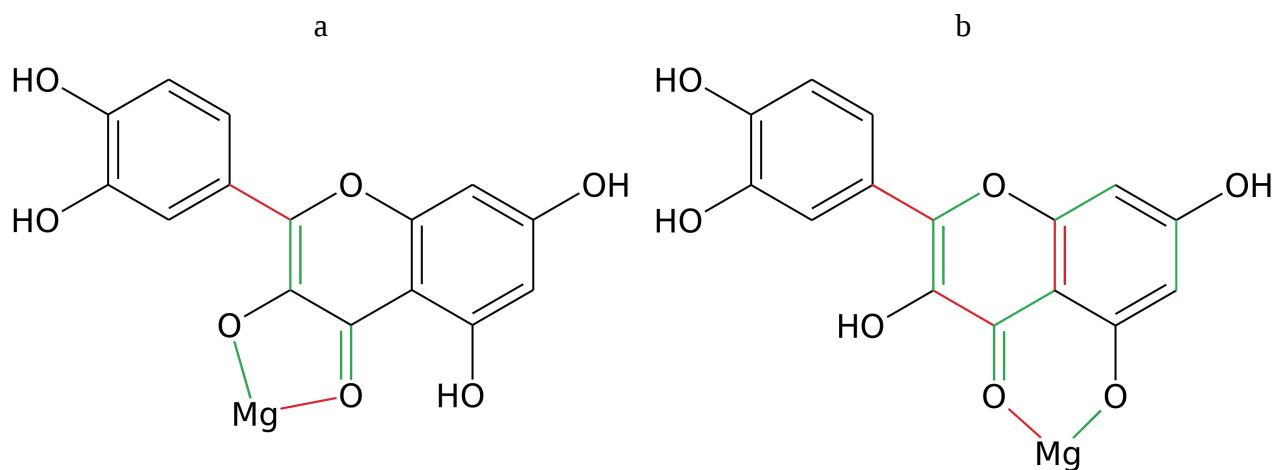

### Cartesian coordinates for 3HF

|   |               |               |               |
|---|---------------|---------------|---------------|
| C | -3.6337265478 | -2.0693725353 | -0.1142159094 |
| C | -4.3420688146 | -0.857408373  | -0.0897323663 |
| C | -3.657880287  | 0.3374807585  | -0.0501783446 |
| C | -2.2535697759 | 0.3477870356  | -0.0342481373 |
| C | -1.5682660508 | -0.8694982996 | -0.0596665857 |
| C | -2.2537282837 | -2.0850411959 | -0.0995768461 |
| H | -5.4260674817 | -0.8661259956 | -0.1019708545 |
| H | -1.6919881603 | -3.0118297718 | -0.1183496792 |
| C | 0.5548947927  | 0.1821293574  | -0.0084182195 |
| C | -0.0386922529 | 1.4119158383  | 0.020053829   |
| C | -1.4802371096 | 1.5705635585  | 0.0086569902  |
| O | -1.9467029502 | 2.7172115472  | 0.0369011672  |
| C | 1.98339541    | -0.1372712337 | -0.0010517646 |
| C | 2.3885847095  | -1.4817226281 | -0.0131253951 |
| C | 2.9703996784  | 0.8608094459  | 0.01664406    |
| C | 3.7346488831  | -1.8148011468 | -0.0069102568 |
| H | 1.6430919579  | -2.2665856155 | -0.0270824335 |
| C | 4.3156590183  | 0.516620924   | 0.0220591814  |
| H | 2.686259749   | 1.9033381934  | 0.0254862532  |
| C | 4.7058271563  | -0.8180683615 | 0.0107267835  |
| O | 0.6447463255  | 2.5699488886  | 0.0617342281  |
| H | -0.0536831271 | 3.2529694074  | 0.0744194565  |
| O | -0.2210591659 | -0.9310241028 | -0.0473148825 |
| H | 4.0262884917  | -2.8597860032 | -0.0159514889 |
| H | -4.1750847799 | -3.0087709061 | -0.1452799209 |
| H | 5.7585775142  | -1.0803805515 | 0.0153821425  |
| H | 5.0640997375  | 1.3019924519  | 0.0352360247  |
| H | -4.1796010167 | 1.2878529939  | -0.0305396212 |

## Cartesian coordinates for 5HF

|   |               |               |               |
|---|---------------|---------------|---------------|
| C | 3.177416326   | 2.1056334187  | -0.855332616  |
| C | 3.9581517334  | 0.9883361993  | -0.5713450931 |
| C | 3.3447992672  | -0.2066464365 | -0.2158586735 |
| C | 1.9326699947  | -0.2751308666 | -0.1469215114 |
| C | 1.188741768   | 0.8726472992  | -0.4398913827 |
| C | 1.7907266726  | 2.0704712031  | -0.7960116773 |
| H | 5.039864548   | 1.0333820974  | -0.6226649614 |
| H | 1.1831554219  | 2.9390421915  | -1.017517662  |
| C | -0.8310051412 | -0.2683586736 | -0.0427387923 |
| C | -0.180928885  | -1.4197052509 | 0.268766563   |
| C | 1.2501001152  | -1.5008946103 | 0.2240515568  |
| C | -2.2862408132 | -0.0787527563 | -0.0286302751 |
| C | -2.8268755676 | 1.2100258882  | 0.0478730998  |
| C | -3.1494522507 | -1.1788774636 | -0.0872580101 |
| C | -4.2028368548 | 1.3904780343  | 0.0810673308  |
| H | -2.1664508755 | 2.067750764   | 0.0917836722  |
| C | -4.5234294231 | -0.9922096935 | -0.0574562531 |
| H | -2.7517595552 | -2.1833325232 | -0.1770988556 |
| C | -5.0545299841 | 0.2918243175  | 0.0294056062  |
| O | -0.1703010668 | 0.8506167594  | -0.389876614  |
| H | -4.6106680861 | 2.3933154052  | 0.1482631865  |
| H | 3.6681343546  | 3.0328224204  | -1.1317985649 |
| H | -6.1296818032 | 0.4348464089  | 0.0521832409  |
| H | -5.1823583024 | -1.8520513837 | -0.1105690266 |
| H | -0.7375069349 | -2.2951083116 | 0.5744956579  |
| O | 1.8822045976  | -2.5437863478 | 0.4939644049  |
| O | 4.0811063672  | -1.2872138235 | 0.0605342833  |
| H | 3.4357984975  | -2.0088851861 | 0.2854654468  |

### Cartesian coordinates for 3'4'diHF

|   |               |               |               |
|---|---------------|---------------|---------------|
| C | -4.3411239618 | -1.8020544978 | -0.5946966136 |
| C | -5.0026499014 | -0.5828375902 | -0.4013378084 |
| C | -4.272727679  | 0.5658432272  | -0.168279915  |
| C | -2.8735929409 | 0.5240290081  | -0.1241769373 |
| C | -2.2380487801 | -0.702421513  | -0.3200565516 |
| C | -2.9607918694 | -1.8703187107 | -0.5553767713 |
| H | -6.0857341682 | -0.5444032402 | -0.4349768866 |
| H | -2.4306672973 | -2.8042073494 | -0.7034276914 |
| C | -0.1086392958 | 0.2577776765  | -0.0701754446 |
| C | -0.6426745311 | 1.4890076179  | 0.1448509631  |
| C | -2.0632342005 | 1.7260727951  | 0.1247075607  |
| O | -2.5671295619 | 2.8362829839  | 0.3089225423  |
| C | 1.3173699895  | -0.072286315  | -0.0719407484 |
| C | 1.7365006728  | -1.4008096952 | 0.0403749209  |
| C | 2.2832065549  | 0.9394298098  | -0.1811045954 |
| C | 3.0876116435  | -1.7160016404 | 0.0584557353  |
| H | 1.0031318409  | -2.1926073632 | 0.1247003906  |
| C | 3.6265102268  | 0.6232003942  | -0.1659093374 |
| H | 1.9915375679  | 1.9775508728  | -0.2998890088 |
| C | 4.0400337854  | -0.7131698322 | -0.0437082868 |
| O | 5.3528620443  | -1.0198549081 | -0.0317586883 |
| O | -0.8836035521 | -0.8212488423 | -0.2983752372 |
| H | 5.8603427994  | -0.202203108  | -0.1136112721 |
| H | 3.4179662751  | -2.7444722183 | 0.1527462746  |
| O | 4.638669488   | 1.5231209547  | -0.2751789481 |
| H | 4.3018839146  | 2.4207547809  | -0.3521194955 |
| H | -4.9134471482 | -2.7051158283 | -0.7776970106 |
| H | -4.7587512051 | 1.5229895168  | -0.0139651673 |
| H | 0.0064945895  | 2.3285004044  | 0.3555617283  |

### Cartesian coordinates for 3HF-Mg<sup>II</sup>

|    |               |               |               |
|----|---------------|---------------|---------------|
| C  | -1.7119400063 | 4.363945558   | 0.0751530381  |
| C  | -2.8947985011 | 3.602324408   | 0.0551943582  |
| C  | -2.82818564   | 2.2291667597  | 0.0209474191  |
| C  | -1.5781338623 | 1.5795891529  | 0.0056600438  |
| C  | -0.4147584816 | 2.3567338731  | 0.026194559   |
| C  | -0.4761463237 | 3.753334875   | 0.0610712533  |
| H  | -3.8566999416 | 4.1025212718  | 0.0667388956  |
| H  | 0.4446600948  | 4.3251074355  | 0.0761813504  |
| C  | 0.9849942336  | 0.4474685691  | -0.0206798245 |
| C  | -0.1000211855 | -0.4193478107 | -0.0470841169 |
| C  | -1.439023251  | 0.1514685068  | -0.0315878797 |
| O  | -2.4238331527 | -0.6349890361 | -0.0522395659 |
| C  | 2.3994437683  | 0.0893825021  | -0.0234354719 |
| C  | 3.3807081145  | 1.0969692048  | 0.0024083634  |
| C  | 2.8210100246  | -1.2513981646 | -0.0490136055 |
| C  | 4.7290385982  | 0.7739218237  | 0.0031654834  |
| H  | 3.08052936    | 2.1372551525  | 0.022215809   |
| C  | 4.1746301799  | -1.5629803636 | -0.0475870158 |
| H  | 2.0731209473  | -2.032114876  | -0.0694193434 |
| C  | 5.1355692065  | -0.5578552205 | -0.0213642563 |
| O  | -0.024345243  | -1.7176451891 | -0.0826849505 |
| O  | 0.8016283786  | 1.79580376    | 0.0136731169  |
| H  | 5.4682289956  | 1.5682241509  | 0.0233305605  |
| H  | -1.7701383349 | 5.4467477652  | 0.1019508936  |
| H  | 6.1914678621  | -0.8077479056 | -0.0202568904 |
| H  | 4.4798235192  | -2.6044268085 | -0.0670118351 |
| H  | -3.7246565848 | 1.6197209314  | 0.0047439569  |
| Mg | -1.8210284973 | -2.6194704814 | -0.1178300618 |
| O  | -3.8425895495 | -3.1398938997 | -0.1361734557 |
| H  | -4.2205973474 | -4.0194757037 | -0.0528978334 |
| O  | -1.3113856903 | -4.6451599351 | -0.209999204  |
| H  | -0.9700902898 | -5.0474018229 | -1.0136825108 |
| H  | -4.5532492066 | -2.5062169277 | -0.0037598885 |
| H  | -0.9315247242 | -5.1188389748 | 0.5352913659  |
| O  | -1.8292541348 | -2.7926956976 | -2.2366467142 |
| H  | -2.6479686114 | -2.7833777043 | -2.7413093308 |
| O  | -1.7333388192 | -2.9455328358 | 1.979791823   |
| H  | -2.4945840238 | -2.9541438088 | 2.567327089   |
| H  | -1.1815553149 | -2.3043162787 | -2.7534130326 |
| H  | -1.0214965657 | -2.508043255  | 2.4566514087  |



## Cartesian coordinates for 5HF-Mg<sup>II</sup>

|    |               |               |               |
|----|---------------|---------------|---------------|
| C  | 1.4072471564  | 3.0104480426  | -2.1963972713 |
| C  | 2.4789998163  | 2.2530679652  | -1.7621764394 |
| C  | 2.3132729256  | 1.1665931993  | -0.8733261636 |
| C  | 0.9665181418  | 0.8780677697  | -0.435620641  |
| C  | -0.0875930934 | 1.6873058624  | -0.9138037791 |
| C  | 0.1036530302  | 2.7445975647  | -1.7829321092 |
| H  | 3.486835326   | 2.4753159925  | -2.0964332153 |
| H  | -0.7430181193 | 3.3300841169  | -2.1184321622 |
| C  | -1.6990390405 | 0.4724864561  | 0.3030472658  |
| C  | -0.7456080021 | -0.3428754755 | 0.818166272   |
| C  | 0.6369689095  | -0.1940070906 | 0.4710713647  |
| C  | -3.1366705678 | 0.4081160486  | 0.5909268435  |
| C  | -3.9563497357 | 1.5104231054  | 0.3227885544  |
| C  | -3.7053464435 | -0.7482066251 | 1.13717337    |
| C  | -5.313671226  | 1.4595016321  | 0.6095216744  |
| H  | -3.5251072092 | 2.4089076603  | -0.1021846602 |
| C  | -5.062709892  | -0.7946207481 | 1.4187217382  |
| H  | -3.093709067  | -1.6232479852 | 1.3256715759  |
| C  | -5.8706569432 | 0.3090144041  | 1.1583717145  |
| O  | -1.3810178128 | 1.4611944336  | -0.5417037621 |
| H  | -5.938022661  | 2.3223838586  | 0.4040147038  |
| H  | 1.5834145399  | 3.8359252377  | -2.8794415194 |
| H  | -6.9320811042 | 0.2698582437  | 1.3792843425  |
| H  | -5.493090699  | -1.6986088018 | 1.8358766698  |
| H  | -1.0082758358 | -1.1204009357 | 1.5222298084  |
| O  | 1.4781905188  | -0.9885591829 | 0.9736244638  |
| O  | 3.3320725449  | 0.4824968538  | -0.4875164595 |
| Mg | 3.4788201585  | -1.0750272735 | 0.7290007645  |
| O  | 5.5343251108  | -0.9541173432 | 0.3740233904  |
| H  | 6.2223547981  | -1.6092676762 | 0.5162375002  |
| O  | 3.8373853247  | -2.7259178817 | 1.9776898123  |
| H  | 3.7814517329  | -2.6497902699 | 2.934385956   |
| H  | 5.8362221731  | -0.35430246   | -0.3145684572 |
| H  | 3.5453031331  | -3.6103100557 | 1.739951652   |
| O  | 3.8127597929  | -0.0099496306 | 2.5491917765  |
| H  | 4.6263304453  | 0.4927301511  | 2.6530864503  |
| O  | 3.2554672773  | -2.6202114692 | -0.7333041296 |
| H  | 2.4008243129  | -2.7263930444 | -1.1617656433 |
| H  | 3.9174623467  | -2.77625153   | -1.4134144044 |
| H  | 3.112275937   | 0.5253108809  | 2.9335531529  |

### Cartesian coordinates for 3'4'diHF-Mg<sup>II</sup>

|    |               |               |               |
|----|---------------|---------------|---------------|
| C  | -5.8899910951 | -1.6492011893 | -0.1592311038 |
| C  | -6.4677812391 | -0.3737820207 | -0.1647001824 |
| C  | -5.6594882614 | 0.7465234501  | -0.1731270321 |
| C  | -4.2654560266 | 0.619170385   | -0.1767461805 |
| C  | -3.7134707632 | -0.6618520929 | -0.1715342894 |
| C  | -4.5153544291 | -1.8014312639 | -0.1624027829 |
| H  | -7.5470598157 | -0.2690461361 | -0.1622773938 |
| H  | -4.0497174084 | -2.7804104023 | -0.1585258418 |
| C  | -1.5142394204 | 0.179157781   | -0.185226066  |
| C  | -1.9727395373 | 1.4647003156  | -0.1855966418 |
| C  | -3.3709794956 | 1.7881473002  | -0.1842570253 |
| O  | -3.8033659051 | 2.9458171604  | -0.1872108749 |
| C  | -0.1223656615 | -0.2425327694 | -0.1928839175 |
| C  | 0.2198879892  | -1.6012898433 | -0.1338322503 |
| C  | 0.9208574609  | 0.7033732218  | -0.2626352417 |
| C  | 1.5398758005  | -2.018082128  | -0.1412910283 |
| H  | -0.5672871567 | -2.3435553773 | -0.0795731376 |
| C  | 2.2211358336  | 0.2753088843  | -0.269751006  |
| H  | 0.7110878439  | 1.7666195806  | -0.318174115  |
| C  | 2.5992358831  | -1.0947915439 | -0.2119712116 |
| O  | 3.8555101204  | -1.411020595  | -0.2295084874 |
| O  | -2.3699329712 | -0.8658526148 | -0.1767394618 |
| H  | 1.7829797153  | -3.074675957  | -0.0945923793 |
| O  | 3.3127473104  | 1.1252643538  | -0.3400584732 |
| Mg | 5.175223708   | 0.0793873018  | -0.3618456948 |
| H  | 3.061283422   | 2.0525251232  | -0.3898263409 |
| O  | 6.3474584139  | 1.7821288663  | -0.5174617804 |
| O  | 6.8095294171  | -1.1912943944 | -0.3686891399 |
| H  | 7.7425292011  | -0.9638202571 | -0.4038903574 |
| H  | 6.7473466741  | -2.1484366055 | -0.3021179284 |
| H  | 6.6540707901  | 2.3254012346  | 0.2134312101  |
| H  | 6.5838800611  | 2.221094169   | -1.3389635562 |
| H  | -6.522880576  | -2.5301496069 | -0.152536128  |
| H  | -6.0784294303 | 1.7469351405  | -0.1771075154 |
| H  | -1.2707348118 | 2.287660519   | -0.1847193347 |
| O  | 5.4329084213  | 0.4264602746  | 1.7165409408  |
| H  | 5.9557983632  | -0.1878025502 | 2.2409588538  |
| O  | 5.2411947132  | 0.1946083223  | -2.482883252  |
| H  | 5.7163021509  | -0.4779523691 | -2.9806076469 |
| H  | 4.6999472708  | 0.7007466861  | 2.2760396615  |
| H  | 4.4581148003  | 0.407558057   | -2.9995392165 |

## Cartesian coordinates for Q

|   |               |               |               |
|---|---------------|---------------|---------------|
| C | 3.8888199803  | -1.7817615935 | 0.0371531883  |
| C | 4.526969761   | -0.5344437379 | 0.0211932704  |
| C | 3.7643453104  | 0.6181218163  | 0.0003385361  |
| C | 2.3500695645  | 0.530135129   | -0.0043008148 |
| C | 1.7541792833  | -0.7373936716 | 0.0114957176  |
| C | 2.5024388054  | -1.9022184004 | 0.0323761288  |
| H | 5.6094104702  | -0.4622885102 | 0.0238511625  |
| H | 2.0264652898  | -2.8741196316 | 0.0451135214  |
| C | -0.4272646251 | 0.21001415    | -0.0121416835 |
| C | 0.095724366   | 1.4724003137  | -0.0303496305 |
| C | 1.5200954     | 1.6904374043  | -0.0257399626 |
| O | 1.9544039361  | 2.868438611   | -0.0442432691 |
| C | -1.8306353889 | -0.1867903653 | -0.0177217183 |
| C | -2.1700637383 | -1.5449312278 | -0.0962953822 |
| C | -2.8653011055 | 0.7625228132  | 0.059591261   |
| C | -3.4966168165 | -1.9457959132 | -0.1015959805 |
| H | -1.39118129   | -2.29352897   | -0.1555858809 |
| C | -4.1847907366 | 0.3547020786  | 0.0572476926  |
| H | -2.6383677933 | 1.8188236266  | 0.1252068412  |
| C | -4.5138307506 | -1.0051527781 | -0.0250635292 |
| O | -5.8046766271 | -1.3983914855 | -0.029666569  |
| O | 4.5942618532  | -2.9294014777 | 0.0578259871  |
| O | 4.3567326611  | 1.8163589477  | -0.0160052423 |
| O | -0.6558130969 | 2.5919720771  | -0.0575315758 |
| H | 3.6371760722  | 2.4924180053  | -0.0304380956 |
| H | -0.0108781541 | 3.3220152491  | -0.0674589874 |
| O | 0.411265203   | -0.8606710955 | 0.0080337448  |
| H | 5.5383771676  | -2.741889324  | 0.0598195165  |
| H | -6.3643598584 | -0.6139006876 | 0.0330457474  |
| H | -3.7582222003 | -2.9963349354 | -0.1648081269 |
| O | -5.2520554169 | 1.1951386159  | 0.1327467853  |
| H | -4.9677015257 | 2.1114229677  | 0.1988813476  |

### Cartesian coordinates for C3

|    |               |               |               |
|----|---------------|---------------|---------------|
| C  | -5.7776464592 | -2.769528629  | 1.4012754895  |
| C  | -5.7248060663 | -1.7765438773 | 0.410747297   |
| C  | -4.6504890576 | -0.9118910975 | 0.3697142318  |
| C  | -3.605596427  | -1.0298870725 | 1.3265176977  |
| C  | -3.7001713752 | -2.0387756141 | 2.297786073   |
| C  | -4.7746726213 | -2.9154213153 | 2.350631181   |
| H  | -6.5187125718 | -1.680076275  | -0.3221238651 |
| H  | -4.829648848  | -3.6860144853 | 3.1087043877  |
| C  | -1.6327674494 | -1.3762699863 | 3.2681032456  |
| C  | -1.4565053623 | -0.3507611815 | 2.3506762189  |
| C  | -2.4773651988 | -0.171704395  | 1.3416812564  |
| O  | -2.3236461529 | 0.7678736151  | 0.4871414234  |
| C  | -0.740150008  | -1.743414851  | 4.3563438361  |
| C  | -1.0499097364 | -2.8252353057 | 5.1959270024  |
| C  | 0.4492510247  | -1.0296985813 | 4.5937181983  |
| C  | -0.2052295801 | -3.1826171548 | 6.2349424277  |
| H  | -1.9581323959 | -3.3911391406 | 5.0349540567  |
| C  | 1.2841726809  | -1.3932917471 | 5.6327506102  |
| H  | 0.6987558682  | -0.1937620078 | 3.9505069903  |
| C  | 0.9658938443  | -2.4734880475 | 6.4648412243  |
| O  | 1.7863849687  | -2.8248617657 | 7.4809220109  |
| O  | -6.8132356791 | -3.6299330069 | 1.4725406803  |
| O  | -4.5924972453 | 0.0383343599  | -0.570554673  |
| O  | -0.4445601263 | 0.4716502121  | 2.3140742841  |
| H  | -3.7557883899 | 0.5374661844  | -0.4206218782 |
| O  | -2.7345995816 | -2.1796124193 | 3.2159277782  |
| H  | -7.4550699133 | -3.4387649264 | 0.7811249362  |
| H  | 2.5375556984  | -2.2184686996 | 7.4891965022  |
| H  | -0.4460001001 | -4.0185875347 | 6.8828488052  |
| O  | 2.4531373647  | -0.7612895458 | 5.9362799441  |
| H  | 2.605913428   | -0.0221082263 | 5.3405484741  |
| Mg | -0.5513551115 | 1.8091677641  | 0.817938164   |
| O  | 1.2159092547  | 2.8999364595  | 1.0622545206  |
| H  | 1.3510303322  | 3.5216843805  | 1.7829212886  |
| O  | -0.9913155337 | 3.0276054804  | -0.8179247402 |
| H  | -0.4429646992 | 3.7503245506  | -1.1351125806 |
| H  | -1.7770629317 | 2.9968160182  | -1.3705868357 |
| H  | 2.0733822711  | 2.5285977945  | 0.8359485136  |
| O  | 0.6594279553  | 0.6089676186  | -0.4479187448 |
| H  | 0.8402896105  | -0.2987351561 | -0.1859603977 |
| H  | 0.5776727547  | 0.6086813199  | -1.4061160918 |
| O  | -1.3738564623 | 3.2760000673  | 2.1112411817  |
| H  | -1.9868230853 | 3.9590096474  | 1.8239850443  |
| H  | -1.6676772171 | 2.988940733   | 2.9810851912  |

## Cartesian coordinates for C5

|    |           |           |           |
|----|-----------|-----------|-----------|
| C  | -2.238819 | 3.402623  | 0.016231  |
| C  | -3.234603 | 2.432387  | 0.001885  |
| C  | -2.924892 | 1.061791  | -0.004337 |
| C  | -1.521667 | 0.70224   | 0.004076  |
| C  | -0.555081 | 1.73244   | 0.017761  |
| C  | -0.882908 | 3.073279  | 0.024153  |
| H  | -4.281822 | 2.719471  | -0.004178 |
| H  | -0.116591 | 3.837086  | 0.034883  |
| C  | 1.252648  | 0.183309  | 0.02074   |
| C  | 0.371327  | -0.858372 | 0.008224  |
| C  | -1.053131 | -0.635762 | -0.001204 |
| O  | -1.764296 | -1.690373 | -0.014646 |
| C  | 2.710287  | 0.142303  | 0.029102  |
| C  | 3.439329  | 1.339932  | 0.033975  |
| C  | 3.415262  | -1.074408 | 0.032122  |
| C  | 4.825157  | 1.327816  | 0.041217  |
| H  | 2.918546  | 2.28834   | 0.031816  |
| C  | 4.79649   | -1.078009 | 0.039477  |
| H  | 2.883564  | -2.017073 | 0.028776  |
| C  | 5.516128  | 0.124487  | 0.043895  |
| O  | 6.865828  | 0.115522  | 0.050624  |
| O  | -2.534227 | 4.720864  | 0.023119  |
| O  | -3.854893 | 0.175301  | -0.016698 |
| O  | 0.750911  | -2.152843 | 0.002282  |
| H  | -0.090763 | -2.646173 | -0.006805 |
| Mg | -3.790489 | -1.808412 | -0.024879 |
| O  | -5.876286 | -1.776188 | 0.003143  |
| H  | -6.356737 | -0.951643 | -0.113615 |
| O  | -3.902167 | -3.903872 | -0.033508 |
| H  | -3.69935  | -4.427172 | 0.746951  |
| H  | -6.486544 | -2.498454 | -0.16689  |
| H  | -3.670793 | -4.429615 | -0.804234 |
| H  | 7.166194  | -0.802208 | 0.05079   |
| H  | -3.489118 | 4.841993  | 0.018271  |
| O  | 0.766692  | 1.446852  | 0.025448  |
| H  | 5.387764  | 2.254954  | 0.044656  |
| O  | 5.563948  | -2.201638 | 0.043021  |
| H  | 5.018156  | -2.993473 | 0.037152  |
| O  | -3.831825 | -2.099708 | 2.087304  |
| H  | -4.637505 | -1.890817 | 2.569827  |
| O  | -3.773937 | -2.081454 | -2.14161  |
| H  | -4.5327   | -1.846157 | -2.683999 |
| H  | -2.995174 | -1.806143 | -2.634748 |
| H  | -3.102363 | -1.787687 | 2.63109   |
